# Supplementary material
Source: Springer Nature journal article supplement (https://www.springermedizin.de/resource/supplementary/12885_2012_3845_MOESM1_ESM.pdf/9464516)

**A**

KB

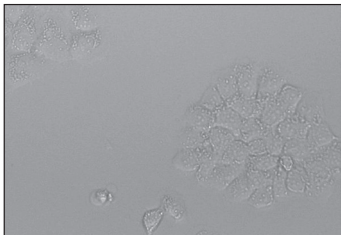

KB/VCR

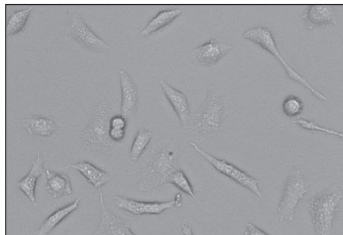**B**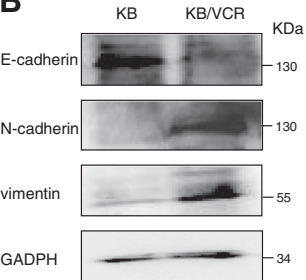**C**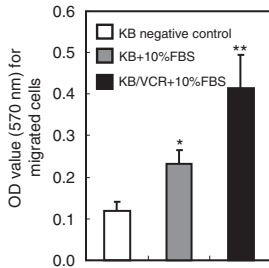**D**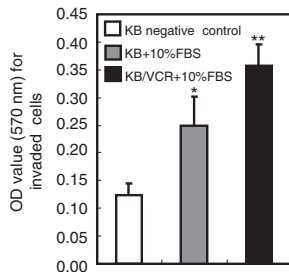

Supplement: MOESM1 [file 9464516]
